# Supplementary material
Source: PubMed Central journal article supplement (PMC7062240)
Supplement: NIHMS1559766-supplement-Supplementary_material.pdf [file NIHMS1559766-supplement-Supplementary_material.pdf]

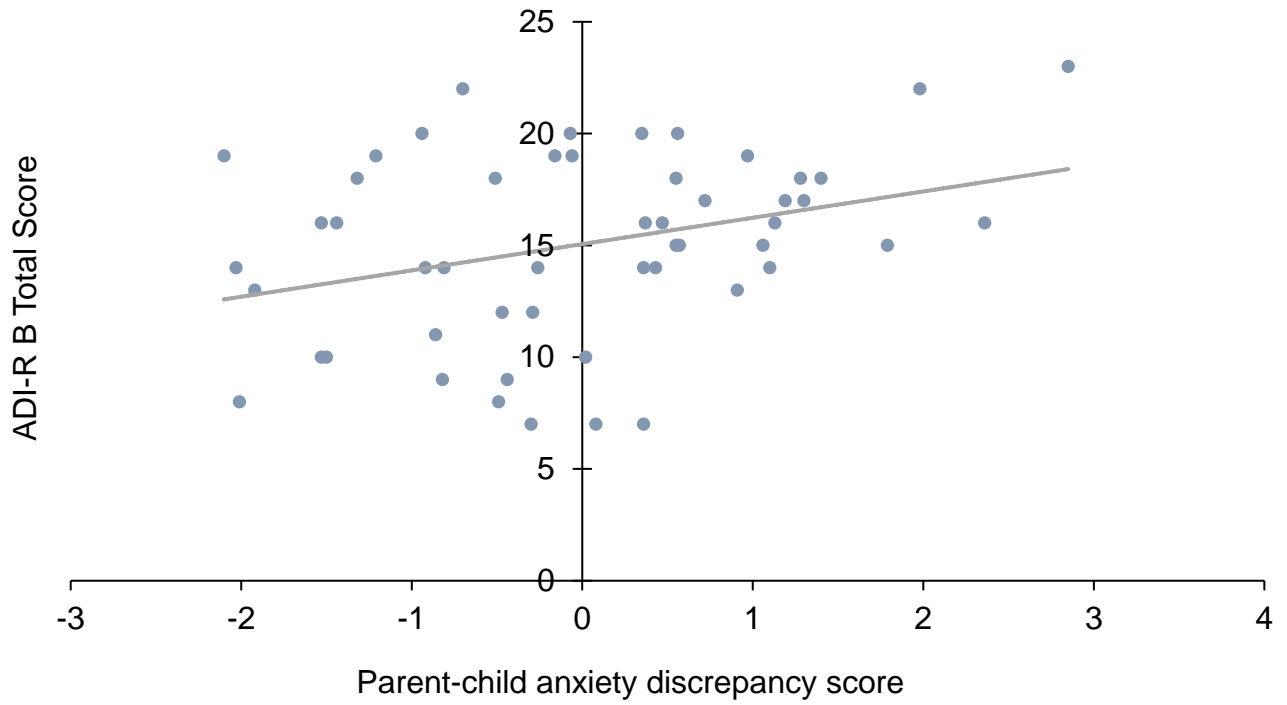

*Supp. Figure S1.* Association between parent-child anxiety discrepancy score and qualitative abnormalities in communication measured by the Autism Diagnostic Interview-Revised in the ASD-combined group (ASD with comorbid anxiety plus without comorbid anxiety,  $n = 52$ ). Parent-child discrepancy score = standardized parent MASC-2 Total Anxiety T-score – standardized child MASC-2 Total Anxiety T-score.

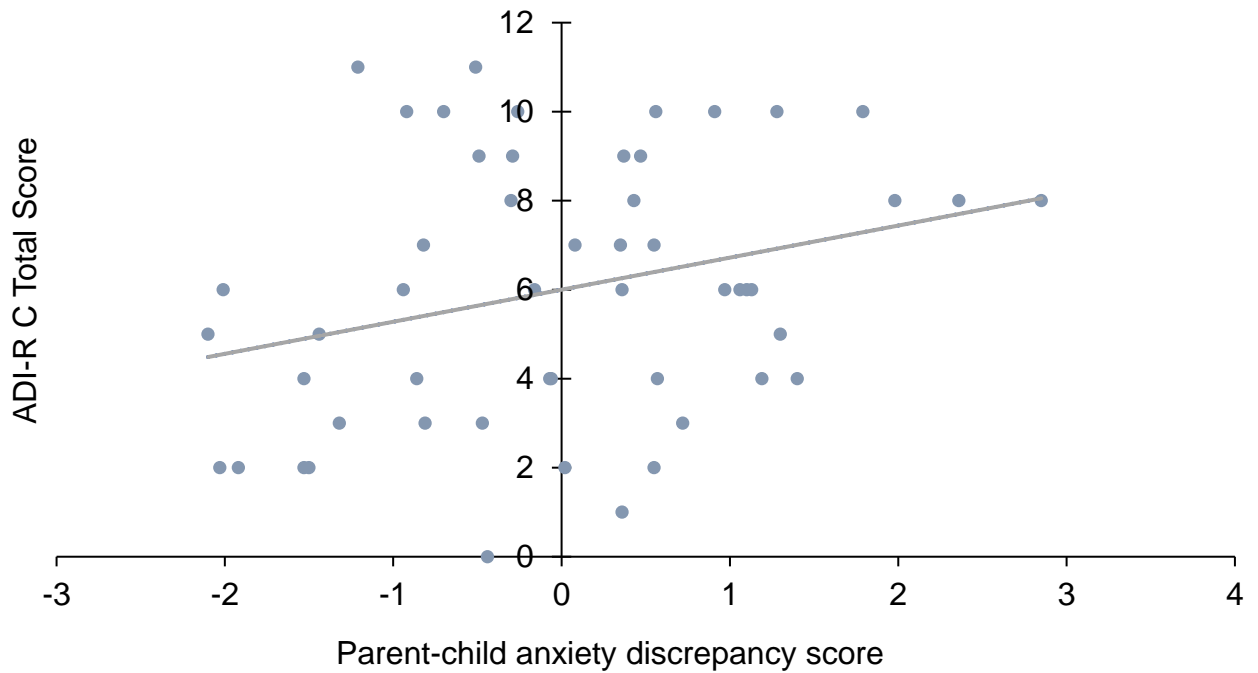

*Supp. Figure S2.* Association between parent-child anxiety discrepancy score and restricted, repetitive, and stereotyped patterns of behavior measured by the Autism Diagnostic Interview-Revised in the ASD-combined group (ASD with comorbid anxiety plus without comorbid anxiety,  $n = 52$ ). Parent-child discrepancy score = standardized parent MASC-2 Total Anxiety T-score – standardized child MASC-2 Total Anxiety T-score.
